# Supplementary material for: Single-Dose Rifampicin Leprosy Chemoprophylaxis for Household Contacts in Kiribati: An Audit of a Combined Retrospective and Prospective Approach
Source: MDPI journal article supplement (doi:10.3390/tropicalmed9030058), 2024-03-01
Supplement: s1 [file s1]

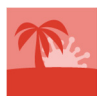

Article

# Single-Dose Rifampicin Leprosy Chemoprophylaxis for Household Contacts in Kiribati: An Audit of a Combined Retrospective and Prospective Approach

Patrick O. Campbell <sup>1,2,\*</sup>, Temea Bauro <sup>3,†</sup>, Ereii Rimon <sup>3</sup>, Eretii Timeon <sup>3</sup>, Caitlin Bland <sup>4</sup>, Nabura Ioteba <sup>5</sup>, Nicholas M. Douglas <sup>2,6,7</sup>, Arturo Cunanan <sup>8,9</sup> and Stephen T. Chambers <sup>1</sup>

<sup>1</sup> Department of Pathology and Biomedical Science, University of Otago, Christchurch 8011, New Zealand; steve.chambers@otago.ac.nz

<sup>2</sup> Department of Infectious Diseases, Christchurch Hospital, Te Whatu Ora Waitaha, Canterbury 8011, New Zealand; nick.douglas@otago.ac.nz

<sup>3</sup> Government of the Republic of Kiribati Ministry of Health and Medical Services, Tarawa P.O. Box 268, Kiribati; temea.bauro@mhms.gov.ki (T.B.)

<sup>4</sup> Otago Medical School, University of Otago, Christchurch 8011, New Zealand

<sup>5</sup> Pasifika Medical Association, Christchurch 8011, New Zealand

<sup>6</sup> Department of Medicine, University of Otago, Christchurch 8011, New Zealand

<sup>7</sup> Division of Global and Tropical Health, Menzies School of Health Research, Charles Darwin University, Darwin, NT 0811, Australia

<sup>8</sup> Department of Health, Culion Sanatorium and General Hospital, Culion 5315, Philippines

<sup>9</sup> Division of Programmes for Disease Control, Manila 1003, Philippines

\* Correspondence: patrick.campbell@cdhb.health.nz

† These authors contributed equally to this work.

**Table S1.** Single dose rifampicin (SDR) chemoprophylaxis dosing.

| Age/Body Weight                     | Rifampicin Single Dose |
|-------------------------------------|------------------------|
| >15 years old                       | 600 mg                 |
| 10–14 years                         | 450 mg                 |
| Children 6–9 years (weight ≥ 20 kg) | 300 mg                 |
| Children 6–9 years (weight < 20 kg) | 150 mg                 |
| Children < 5 years                  | 10–15 mg/kg            |

**Disclaimer/Publisher's Note:** The statements, opinions and data contained in all publications are solely those of the individual author(s) and contributor(s) and not of MDPI and/or the editor(s). MDPI and/or the editor(s) disclaim responsibility for any injury to people or property resulting from any ideas, methods, instructions or products referred to in the content.
